# Supplementary material
Source: PubMed Central journal article supplement (PMC8209752)
Supplement: NIHMS1698126-supplement-Supplementary_Appendix_1698155.pdf [file NIHMS1698126-supplement-Supplementary_Appendix_1698155.pdf]

# THE LANCET

## Haematology

### Supplementary appendix

This appendix formed part of the original submission and has been peer reviewed. We post it as supplied by the authors.

Supplement to: Mesa RA, Vannucchi AM, Mead A, et al. Pacritinib versus best available therapy for the treatment of myelofibrosis irrespective of baseline cytopenias (PERSIST-1): an international, randomised, phase 3 trial. *Lancet Haematol* 2017; published online March 20. [http://dx.doi.org/10.1016/S2352-3026\(17\)30027-3](http://dx.doi.org/10.1016/S2352-3026(17)30027-3).

## Supplementary Appendix

### Investigator List

| Study Site                                                                      | Principal Investigator            | Patients Randomized, n |
|---------------------------------------------------------------------------------|-----------------------------------|------------------------|
| First Republican Clinical Hospital of Ministry of Health of the Udmust Republic | Alexander Suvorov                 | 14                     |
| Kaposi Mor Okato Korhaz                                                         | Miklos Egyed                      | 14                     |
| SZTE II. Sz Belgyogyozsati Klinika es Kardiologiai Kozpont                      | Zita Borbenyi                     | 14                     |
| Bekes Megyei Pandy Kalman Korhaz                                                | Janos Jakucs                      | 13                     |
| Haematology and Oncology Clinics of Australia                                   | Andrew Perkins                    | 12                     |
| Royal Hobart Hospital                                                           | Ritam Prasad                      | 10                     |
| Semmelweis Egyetem AOK                                                          | Judit Demeter                     | 10                     |
| Faculty Hospital Brno-Bohunice                                                  | Jiri Mayer                        | 10                     |
| Andrew Love Cancer Centre                                                       | Philip Campbell                   | 9                      |
| Canterbury District Health Board                                                | Peter Ganly                       | 8                      |
| CHU Caremeau Nimes                                                              | Eric Jourdan                      | 7                      |
| CHU Purpan                                                                      | Chrisitan Recher                  | 7                      |
| Debreceni Egyetem Orvos-es Egesz Segtudomanyi Centrum Belgyogyaszati Intezet    | Arpad Illes                       | 7                      |
| Van Megyei Markusovszky Korhoz Nonprofit Zrt                                    | Janos Laszlo Ivanyi               | 7                      |
| North Shore Hospital                                                            | Anna Elinder-Camburn              | 7                      |
| Republican Hospital n.a. V.A. Baranov                                           | Aleksandr Myasnikov               | 7                      |
| University Hospital Maastricht                                                  | Harry Schouten                    | 6                      |
| Erasmus MC                                                                      | Peter te Boekhorst                | 6                      |
| University Medical Center Utrecht                                               | Reinier Raymakers                 | 6                      |
| Haematology Research Center                                                     | Elena Lukina                      | 6                      |
| CHU Amiens Picardie                                                             | Jean Pierre Marolleau             | 6                      |
| Russian Research Institute of Haematology & Transfusiology                      | Kudrat Mugutdinovich Abdulkadyrov | 6                      |
| Gosford Hospital                                                                | Campbell Tiley                    | 6                      |
| Box Hill Hospital                                                               | Paul Coughlin                     | 5                      |
| Hospital St. Louis                                                              | Jean-Jacques Kiladjian            | 5                      |
| Military Medical Academy n.a. S Kirov                                           | Vadim Vitalievich Tyrenko         | 5                      |
| Volgograd Regional Clinical Oncology Dispensary #1                              | Kamil Kaplanov                    | 5                      |
| Ospedale "Infermi", Rimini                                                      | Patrizia Tosi                     | 5                      |
| The Christie NHS Foundation Trust                                               | Tim Somerville                    | 5                      |
| Cardiff University/Hospital of Wales                                            | Steven Knapper                    | 5                      |
| Guys and St Thomas – NHS Foundation Trust                                       | Claire Harrison                   | 5                      |
| Faculty Hospital Olomouc                                                        | Karel Indrak                      | 5                      |
| Dunedin Hospital                                                                | Shingirai Chiruka                 | 4                      |
| Saint-Petersburg State Medical University n.a. academician I.P. Pavlov          | Boris Afanasyev                   | 4                      |
| Samara Regional Clinical Hospital n.a. M.I.Kalinin                              | Victor Rossiev                    | 4                      |
| Hammersmith Hosp – ICH NHS Trust                                                | Dragana Milojkovic                | 4                      |
| Coffs Harbour Health Campus                                                     | Martin Browne                     | 4                      |
| Dipartimento di Oncoematologia                                                  | Fabio Ciceri                      | 4                      |
| University Hospital Pilsen                                                      | Pavel Jindra                      | 3                      |
| Istituto di Ematologia L. & A. Seragnoli                                        | Giovanni Martinelli               | 3                      |
| San Gerardo Hospital                                                            | Carlo-Gambacorti-Passerini        | 3                      |
| VU University Medical Center                                                    | Sonja Zweegman                    | 3                      |
| Hematology-Oncology Associates of Northern Jersey                               | Charles Farber                    | 3                      |
| ZNA – Stuivenberg                                                               | Pierre G G B J Zachee             | 3                      |
| Hospital Claude Huriez                                                          | Nathalie Cambier                  | 3                      |
| Hopital Haut-Leveque                                                            | Axelle Lascaux                    | 3                      |
| Jasz-Nagykun-Szolnok                                                            | Gyorgy Ujj                        | 3                      |
| Oxford University Hospitals NHS Trust                                           | Adam Mead                         | 3                      |
| University of Florence, Hospital Careggi                                        | Alessandro Vannucchi              | 3                      |
| CHU de Strasbourg                                                               | Shanti Natarajan-Ame              | 2                      |
| ZNA – Middelheim                                                                | Dr. De Bock                       | 2                      |
| Centre Hospitalier de Jolimont-Lobbés                                           | Nicole Straetmans                 | 2                      |
| Upstate Oncology Associates                                                     | Fahd Quddus                       | 2                      |
| Bács-Kiskun Megyei Kórház Szegedi Tudományegyetem                               | Mihaly Gurzo                      | 2                      |
| Azienda Ospedaliera di Padova                                                   | Maria Randi                       | 2                      |
| Addenbrookes Hospital                                                           | Anthony Green                     | 2                      |
| Klinik I für Innere Medizin, Universität Köln                                   | Christof Scheid                   | 2                      |
| Municipal Health Care Institution Sochi Oncology Dispensary No2                 | Dmitriy Petrovich Udovitsa        | 2                      |

|                                                           |                       |   |
|-----------------------------------------------------------|-----------------------|---|
| AZ Sint Jan Brugge-Oostende AV                            | Jan van Droogenbroeck | 1 |
| Cliniques Universitaires Saint-Luc                        | Laurent Knoops        | 1 |
| CHU de Caen                                               | Khaled Benabed        | 1 |
| Centre Hospitalier Lyon Sud                               | Fiorenza Barraco      | 1 |
| S.C. Ematologia, A.O. Arcispedale Santa Maria Nuova-IRCCS | Alessia Tieghi        | 1 |
| Birmingham Heartlands Hospital                            | Jo Ewing              | 1 |
| Gemeinschaftspraxis Hämatologie/Onkologie                 | Thomas Illmer         | 1 |
| University Hospital Leipzig                               | Dietget Niederwieser  | 1 |
| Waikato Hospital                                          | Shadul Islam          | 1 |
| Mayo Clinic Arizona                                       | Ruben A Mesa          | 0 |
| Central Clinical Hospital #2 n.a. Semashko                | Andrey Gubkin         | 0 |
| University of Munster                                     | Tim Sauer             | 0 |
| Universitätsklinikum Essen                                | Juergen Novotny       | 0 |
| University of Nebraska                                    | Krishna Gundabolu     | 0 |
| Städtisches Klinikum München GmbH                         | Meinolf Karthaus      | 0 |
| Universitätsklinikum Mainz                                | Thomas Kindler        | 0 |
| Campus Virchow, Charite, Humboldt University, Berlin      | Phillipp Le Coutre    | 0 |
| The Royal Bournemouth Hospital                            | Joseph Chacko         | 0 |
| Uniklinik Freiburg                                        | Nikolas von Bubnoff   | 0 |
| Institute of Haematology and Blood Transfusion            | Jiri Schwarz          | 0 |
| Centre Hospitalo Universitaire de Grenoble                | Jean-Yves Cahn        | 0 |
| Centre Hospitalier de Lens                                | Brigitte Dupriez      | 0 |
| Hopital St Antoine                                        | Nicole Casadevall     | 0 |

**Supplementary Table 1. Six Common Symptoms Across MPN-SAF TSS Versions.**

| TSS (Original Version)                                    | TSS 2·0                                         |
|-----------------------------------------------------------|-------------------------------------------------|
| Fatigue (weariness, tiredness)                            | Tiredness                                       |
| Filling up quickly when you eat (early satiety)           | Filling up quickly when you eat (early satiety) |
| Abdominal discomfort                                      | Abdominal discomfort                            |
| Inactivity*                                               | Inactivity*                                     |
| Problems with concentration – compared to prior to my MPD | NA                                              |
| Night sweats                                              | Night sweats                                    |
| Itching (pruritus)                                        | Itching (pruritus)                              |
| Bone pain (diffuse not joint pain or arthritis)           | Bone pain (diffuse not joint pain or arthritis) |
| Fever (>100° F)                                           | NA                                              |
| Unintentional weight loss last 6 months                   | NA                                              |
| NA                                                        | Pain under ribs on the left side                |

\*Inactivity is not counted in TSS.

MPD, myeloproliferative disorder; MPN-SAF, Myeloproliferative Neoplasm Symptom Assessment Form; NA, not applicable; TSS, total symptom score.

**Supplementary Table 2. Distribution of Risk Factors at Baseline by Randomized Treatment and Baseline White Blood Cell (WBC) Risk Group.**

| Other Risk Factors at Baseline, n (%) | WBC>25,000/ $\mu$ L |            | WBC $\leq$ 25,000/ $\mu$ L |            |
|---------------------------------------|---------------------|------------|----------------------------|------------|
|                                       | Pacritinib (n=43)   | BAT (n=26) | Pacritinib (n=177)         | BAT (n=80) |
| Peripheral blood blasts $\geq$ 1%     | 29 (67·4)           | 11 (42·3)  | 83 (46·9)                  | 36 (45·0)  |
| Platelet count <100,000/ $\mu$ L      | 18 (41·9)           | 6 (23·1)   | 54 (30·5)                  | 27 (33·8)  |
| Hemoglobin <10 g/dL                   | 19 (44·2)           | 7 (26·9)   | 65 (36·7)                  | 40 (50·0)  |
| MF Fibrosis Grade >1                  | 40 (93·0)           | 19 (73·1)  | 140 (79·1)                 | 64 (80·0)  |
| Age >65 years                         | 30 (69·8)           | 12 (46·2)  | 96 (54·2)                  | 37 (46·3)  |
| Number of risk factors, n (%)         |                     |            |                            |            |
| 6                                     | 8 (18·6)            | 0          | 0                          | 0          |
| 5                                     | 8 (18·6)            | 5 (19·2)   | 9 (5·1)                    | 3 (3·8)    |
| 4                                     | 14 (32·6)           | 5 (19·2)   | 32 (18·1)                  | 18 (22·5)  |
| 3                                     | 9 (20·9)            | 5 (19·2)   | 38 (21·5)                  | 15 (18·8)  |
| 2                                     | 4 (9·3)             | 7 (26·9)   | 49 (27·7)                  | 25 (31·3)  |
| 1                                     | 0                   | 1 (3·8)    | 24 (13·6)                  | 11 (13·8)  |
| 0                                     | 0                   | 0          | 9 (5·1)                    | 4 (5·0)    |
| Missing                               | 0                   | 3 (12)     | 16 (9·0)                   | 4 (5·0)    |

.BAT, best available therapy.

**Supplementary Table 3. Most Common Treatments in the BAT Arm.**

| WHO Drug Term, n (%)                   | BAT (n=106) | BAT (n=106)            |
|----------------------------------------|-------------|------------------------|
| Watchful waiting (no active treatment) | 27 (25·5)   |                        |
| Hydroxyurea                            | 60 (56·6)   | Anagrelide 1 (0·9)     |
| Prednisone                             | 7 (6·6)     | Azacitidine 1 (0·9)    |
| Interferon alfa                        | 7 (6·6)     | Epoetin alfa 1 (0·9)   |
| Thalidomide                            | 6 (5·7)     | Epoetin theta 1 (0·9)  |
| Danazol                                | 4 (3·8)     | Everolimus 1 (0·9)     |
| Prednisolone                           | 4 (3·8)     | Lenalidomide 1 (0·9)   |
| Busulfan                               | 2 (1·9)     | Mercaptopurine 1 (0·9) |
| Cytarabine                             | 2 (1·9)     | Methotrexate 1 (0·9)   |
| Peginterferon alfa-2a                  | 2 (1·9)     | Vincristine 1 (0·9)    |

BAT, best available therapy.

**Supplementary Table 4. Demographic and Disease Characteristics With Apparent Imbalances Across BAT Therapies**

| Characteristic, n (%)                | Watch and Wait Only (n=27) | Hydroxyurea Only (n=40) | Other (n=40) |
|--------------------------------------|----------------------------|-------------------------|--------------|
| Age ≥65 years                        | 11 (40.7)                  | 17 (42.5)               | 27 (67.5)    |
| Male sex                             | 15 (55.6)                  | 20 (50.0)               | 25 (62.5)    |
| ECOG PS 2-3                          | 4 (14.8)                   | 1 (2.5)                 | 6 (15.0)     |
| Hypocellular (<20%) bone marrow      | 5 (18.5)                   | 5 (12.5)                | 7 (17.5)     |
| JAK2 <sup>V617F</sup> -positive      | 23 (85.2)                  | 38 (95.0)               | 31 (77.5)    |
| Platelet count                       |                            |                         |              |
| <50,000/μL                           | 6 (22.2)                   | 4 (10.0)                | 6 (15.0)     |
| ≥50,000 to <100,000/μL               | 8 (29.6)                   | 2 (5.0)                 | 8 (20.0)     |
| Primary myelofibrosis                | 19 (70.4)                  | 16 (40.0)               | 24 (60.0)    |
| Anemia                               | 21 (77.8)                  | 19 (47.5)               | 30 (75.0)    |
| Current DIPSS intermediate-2 or high | 16 (59.3)                  | 17 (42.5)               | 25 (62.5)    |
| RBC-TD (Gale criteria)               | 6 (22.2)                   | 3 (7.5)                 | 6 (15.0)     |

BAT, best available therapy; DIPSS, Dynamic International Prognostic Scoring System; ECOG PS, Eastern Cooperative Oncology Group performance status; RBC-TD, red blood cell transfusion-dependent.

**Supplementary Table 5. Spleen Volume Reduction (SVR) at Week 24 by Treatment and Baseline JAK2 Status**

| Treatment  | Baseline JAK2 Status  | Percent SVR at Week 24 |               |                      |       |      |
|------------|-----------------------|------------------------|---------------|----------------------|-------|------|
|            |                       | n                      | Mean (SD)     | Median (IQR)         | Min   | Max  |
| Pacritinib | JAK2 <sup>WT</sup>    | 58                     | -24.3 (19.80) | -24.5 (-34.0, -13.0) | -76.0 | 38.0 |
|            | JAK2 <sup>V617F</sup> | 109                    | -23.4 (16.92) | -23.0 (-35.0, -14.0) | -67.0 | 39.0 |
| BAT        | JAK2 <sup>WT</sup>    | 42                     | -5.9 (18.73)  | -5.0 (-15.0, 7.0)    | -51.0 | 47.0 |
|            | JAK2 <sup>V617F</sup> | 42                     | 5.4 (15.13)   | 3.0 (-5.0, 17.0)     | -27.0 | 41.0 |

BAT, best available therapy; WT, wild type.

**Supplementary Table 6. Reductions in Allele Burden**

| Treatment  | n   | Mean  | Std Dev | Median | Q1    | Q3   | Min    | Max   |
|------------|-----|-------|---------|--------|-------|------|--------|-------|
| Pacritinib | 154 | -34.4 | 39.87   | -31.6  | -57.5 | -7.5 | -100.0 | 101.3 |
| BAT        | 89  | -11.1 | 42.12   | -10.4  | -28.0 | 0.4  | -100.0 | 200.0 |

BAT, best available therapy; Std Dev; standard deviation; Q, quartile.

**Supplementary Table 7. Proportion of Patients Achieving ≥50% Reduction in TSS at Week 24 by TSS Version.**

| Patients Achieving ≥50% TSS Reduction, n/N (%) [95% CI] | TSS (Original Version)       |                          |         | TSS 2.0                      |                           |         |
|---------------------------------------------------------|------------------------------|--------------------------|---------|------------------------------|---------------------------|---------|
|                                                         | Pacritinib                   | BAT                      | P value | Pacritinib                   | BAT                       | P value |
| All Patients                                            | 36/120 (30.0)<br>[22.0-39.0] | 3/59 (5.1)<br>[1.1-14.1] | <0.0001 | 19/100 (19.0)<br>[11.8-28.1] | 5/48 (10.4)<br>[3.5-22.7] | 0.24    |
| Platelets <100,000/μL                                   | 11/44 (25.0)<br>[13.2-40.3]  | 2/21 (9.5)<br>[1.2-30.4] | 0.19    | 6/28 (21.4)<br>[8.3-41.0]    | 1/13 (7.7)<br>[0.2-36.0]  | 0.40    |
| Platelets <50,000/μL                                    | 4/24 (16.7)<br>[4.7-37.4]    | 1/11 (9.1)<br>[0.2-41.3] | 1.0     | 2/11 (18.2)<br>[2.3-51.8]    | 0/5 (0.0)<br>[0.0-52.2]   | 1.0     |
| Platelets ≥100,000/μL                                   | 25/76 (32.9)<br>[22.5-44.6]  | 1/38 (2.6)<br>[0.1-13.8] | 0.0001  | 13/72 (18.1)<br>[1.00-28.9]  | 4/35 (11.4)<br>[3.2-26.7] | 0.57    |

BAT, best available therapy; TSS, total symptom score.

**Supplementary Table 8. Summary of Patient Global Impression of Change by TSS Version in Evaluable Patients at Week 24.**

| Patient Global Impression of Change, n (%) | TSS (Original Version) |            | TSS 2·0           |            |
|--------------------------------------------|------------------------|------------|-------------------|------------|
|                                            | Pacritinib (n=76)      | BAT (n=33) | Pacritinib (n=68) | BAT (n=35) |
| Very much improved                         | 9 (11·8)               | 0          | 9 (13·2)          | 0          |
| Much improved                              | 32 (42·1)              | 4 (12·1)   | 22 (32·4)         | 2 (5·7)    |
| Minimally improved                         | 19 (25·0)              | 5 (15·2)   | 25 (36·8)         | 3 (8·6)    |
| No change                                  | 10 (13·2)              | 16 (48·5)  | 7 (10·3)          | 24 (68·6)  |
| Minimally worse                            | 5 (6·6)                | 5 (15·2)   | 5 (7·4)           | 6 (17·1)   |
| Much worse                                 | 1 (1·3)                | 3 (9·1)    | 0                 | 0          |
| Very much worse                            | 0                      | 0          | 0                 | 0          |

BAT, best available therapy, TSS, total symptom score.

**Supplementary Table 9. Mean Change From Baseline in Individual Symptom Scores.**

| Percentage change, mean* (IQR) [range] | Week 24                        |                                |                               | Week 48                        |                               |                              |
|----------------------------------------|--------------------------------|--------------------------------|-------------------------------|--------------------------------|-------------------------------|------------------------------|
|                                        | Pacritinib (n=146)             | BAT (n=73)                     | BAT Crossover† (n=56)         | PAC (n=99)                     | BAT (n=6)                     | BAT Crossover† (n=22)        |
| Worst fatigue/tiredness                | -21 (-50, -3)<br>[-100, 279]   | +48 (-26, 32)<br>[-100, 2850]  | +5 (-17, 8)<br>[-66, 233]     | -25 (-61, -2)<br>[-100, 144]   | +5 (-33, 53)<br>[-100, 112]   | -15 (-29, 4)<br>[-94, 31]    |
| Early satiety                          | -35 (-73, -3)<br>[-100, 148]   | +4 (-27, 22)<br>[-100, 313]    | -16 (-46, 7)<br>[-100, 76]    | -42 (-99, -11)<br>[-100, 200]  | +86 (-21, 192)<br>[-42, 312]  | -35 (-74, -6)<br>[-100, 55]  |
| Abdominal discomfort                   | -26 (-83, -4)<br>[-100, 600]   | +82 (-32, 27)<br>[-100, 3436]  | +10 (-45, 6)<br>[-98, 736]    | -30 (-84, -26)<br>[-100, 600]  | +48 (-88, 62)<br>[-98, 338]   | -8 (-41, 2)<br>[-97, 136]    |
| Night sweats                           | -53 (-100, -35)<br>[-100, 600] | +101 (-34, 47)<br>[-100, 2025] | -25 (-82, 0)<br>[-100, 185]   | -55 (-100, -36)<br>[-100, 133] | +96 (-71, 102)<br>[-100, 536] | -27 (-66, 20)<br>[-100, 100] |
| Pruritus                               | -33 (-89, 7)<br>[-100, 470]    | +39 (-49, 28)<br>[-100, 1250]  | +16 (-80, 12)<br>[-100, 1369] | -52 (-100, -39)<br>[-100, 250] | +198 (56, 315)<br>[56, 315]   | -18 (-84, 0)<br>[-100, 104]  |
| Bone pain                              | -24 (-97, 4)<br>[-100, 509]    | +4 (-36, 39)<br>[-100, 242]    | -14 (-28, 2)<br>[-100, 70]    | -14 (-100, -1)<br>[-100, 653]  | -65 (-97, -35)<br>[-100, -4]  | 0 (-23, 46)<br>[-100, 68]    |

\*Green indicates improvement from baseline; red indicates worsening from baseline.

†From time of crossover.

BAT, best available therapy.

**Supplementary Table 10. Correlation of Overall Survival with Spleen Volume Reduction at Week 24**

|             | Pacritinib (n=220) |                     | BAT (n=107) |                     |
|-------------|--------------------|---------------------|-------------|---------------------|
|             | n                  | HR (95% CI)         | n           | HR (95% CI)         |
| SVR, %      |                    |                     |             |                     |
| ≥35         | 42                 | 0·234 (0·113-0·485) | 5           | 0·000 (0·000-NR)    |
| 20 to <35   | 60                 | 0·246 (0·133-0·454) | 6           | 1·851 (0·551-6·216) |
| ≥10 to <20% | 38                 | 0·387 (0·207-0·726) | 15          | 0·922 (0·317-2·676) |
| <10%        | 80                 | Reference           | 81          | Reference           |

BAT, best available therapy; SVR, spleen volume reduction.

**Supplementary Table 11. Deaths on Study.**

| Cause of Death                             | Events, n |
|--------------------------------------------|-----------|
| <b>Pacritinib arm</b>                      | <b>76</b> |
| <b>≤24 weeks</b>                           | <b>11</b> |
| <b>&gt;24 weeks</b>                        | <b>65</b> |
| Disease progression                        | 28        |
| Adverse event                              | 28        |
| Disease progression                        | 6         |
| Pneumonia                                  | 3         |
| Cardiac failure acute                      | 2         |
| Acute myeloid leukemia                     | 2         |
| Pneumonia aspiration                       | 1         |
| Renal failure, acute                       | 1         |
| Multiorgan failure                         | 1         |
| Hemorrhage                                 | 1         |
| Traumatic intracranial hemorrhage          | 1         |
| Shock                                      | 1         |
| Hypoxia                                    | 1         |
| Cardiopulmonary arrest                     | 1         |
| Cardiac arrest                             | 1         |
| Sudden death                               | 1         |
| Head injury                                | 1         |
| Sepsis                                     | 1         |
| Myocardial infarction                      | 1         |
| Hepatic failure                            | 1         |
| Cardiac failure congestive                 | 1         |
| Other                                      | 20        |
| <b>BAT arm</b>                             | <b>29</b> |
| <b>≤24 weeks</b>                           | <b>7</b>  |
| <b>&gt;24 weeks</b>                        | <b>22</b> |
| Disease progression                        | 8         |
| Adverse event (during initial study phase) | 3         |
| Disease progression                        | 1         |
| Cardiac failure                            | 1         |
| Sepsis                                     | 1         |
| Adverse event (after crossover)            | 11        |
| Sudden death                               | 2         |
| Pneumonia                                  | 2         |
| Status epilepticus                         | 1         |
| Disseminated intravascular coagulation     | 1         |
| Splenic rupture                            | 1         |
| Disease progression                        | 1         |
| Hemorrhage intracranial                    | 1         |
| Acute leukemia                             | 1         |
| Metastatic squamous cell carcinoma         | 1         |
| Other                                      | 7         |

**Supplementary Table 12. Multivariate Cox Model of OS**

| Covariates in the final model                                | HR (95% CI)          |
|--------------------------------------------------------------|----------------------|
| Baseline platelet count (per 100 unit of 10 <sup>9</sup> /L) | 0.785 (0.685-0.899)  |
| Baseline hemoglobin (per 10 unit g/L)                        | 0.827 (0.752-0.910)  |
| Baseline WBC (per 10 unit of 10 <sup>9</sup> /L)             | 1.229 (1.132 -1.334) |
| Age (per 10 years)                                           | 1.463 (1.161-1.843)  |

All variables assessed: DIPSS risk, platelet count, hemoglobin, white blood cells (WBCs), RBC-transfusion dependency, primary vs secondary myelofibrosis, JAK2 mutation status, time from diagnosis, myelofibrosis fibrosis grade, ECOG PS, age.

**Supplementary Table 13. Hematologic Toxicities at Baseline and Worst Grade, Through Week 24 or Initial Treatment Discontinuation**

|                               | Pacritinib (n=220) |             |             |             |             | BAT (n=106)    |             |             |             |             |
|-------------------------------|--------------------|-------------|-------------|-------------|-------------|----------------|-------------|-------------|-------------|-------------|
|                               | Baseline grade     |             |             |             |             | Baseline grade |             |             |             |             |
|                               | 0                  | 1           | 2           | 3           | 4           | 0              | 1           | 2           | 3           | 4           |
| <b>Hemoglobin, n (%)*</b>     | <b>n=62</b>        | <b>n=74</b> | <b>n=71</b> | <b>n=13</b> | <b>n=0</b>  | <b>n=33</b>    | <b>n=26</b> | <b>n=30</b> | <b>n=16</b> | <b>n=0</b>  |
| Grade 0                       | 36 (58.1)          | 6 (8.1)     | 1 (1.4)     | 1 (7.7)     | 0           | 19 (57.6)      | 2 (7.7)     | 1 (3.3)     | 1 (6.3)     | 0           |
| Grade 1                       | 13 (21.0)          | 27 (36.5)   | 13 (18.3)   | 2 (15.4)    | 0           | 4 (12.1)       | 11 (42.3)   | 4 (13.3)    | 1 (6.3)     | 0           |
| Grade 2                       | 0                  | 22 (29.7)   | 27 (38.0)   | 1 (7.7)     | 0           | 1 (3.0)        | 1 (3.8)     | 7 (23.3)    | 2 (12.5)    | 0           |
| Grade 3                       | 0                  | 1 (1.4)     | 9 (12.7)    | 2 (15.4)    | 0           | 0              | 1 (3.8)     | 2 (6.7)     | 6 (37.5)    | 0           |
| Grade 4                       | 0                  | 0           | 0           | 0           | 0           | 0              | 0           | 0           | 0           | 0           |
| Grade 5                       | 0                  | 0           | 0           | 0           | 0           | 0              | 0           | 0           | 0           | 0           |
| <b>Platelet count, n (%)*</b> | <b>n=119</b>       | <b>n=39</b> | <b>n=16</b> | <b>n=21</b> | <b>n=13</b> | <b>n=59</b>    | <b>n=19</b> | <b>n=5</b>  | <b>n=6</b>  | <b>n=10</b> |
| Grade 0                       | 69 (58.0)          | 7 (17.9)    | 1 (6.3)     | 0           | 0           | 27 (45.8)      | 2 (10.5)    | 0           | 0           | 0           |
| Grade 1                       | 15 (12.6)          | 10 (25.6)   | 1 (6.3)     | 2 (9.5)     | 0           | 2 (3.4)        | 6 (31.6)    | 0           | 0           | 0           |
| Grade 2                       | 2 (1.7)            | 6 (15.4)    | 0           | 2 (9.5)     | 0           | 1 (1.7)        | 2 (10.5)    | 0           | 0           | 1 (10.0)    |
| Grade 3                       | 1 (0.8)            | 3 (7.7)     | 4 (25.0)    | 7 (33.3)    | 2 (15.4)    | 0              | 2 (10.5)    | 3 (60.0)    | 1 (16.7)    | 1 (10.0)    |
| Grade 4                       | 1 (0.8)            | 0           | 0           | 2 (9.5)     | 4 (30.8)    | 0              | 0           | 0           | 0           | 5 (50.0)    |
| Grade 5                       | 0                  | 0           | 0           | 0           | 0           | 0              | 0           | 0           | 0           | 0           |

\*Green indicates  $\geq 1$  grade improvement from baseline; red indicates a  $\geq 1$  grade worsening from baseline.  
 BAT, best available therapy.



**Supplementary Table 14. Most Common Adverse Events and Hematologic Toxicities With Pacritinib at Any Time on Study**

| All grade in >10% or grade 3 in >2% of Patients, n (%) | Pacritinib (n=220)    |             |             |             |             |
|--------------------------------------------------------|-----------------------|-------------|-------------|-------------|-------------|
|                                                        | Grade 1/2             | Grade 3     | Grade 4     | Grade 5     | All         |
| Diarrhea                                               | 127 (57.7)            | 16 (7.3)    | 0           | 0           | 143 (65.0)  |
| Nausea                                                 | 67 (30.5)             | 3 (1.4)     | 0           | 0           | 70 (31.8)   |
| Anemia                                                 | 10 (4.5)              | 48 (21.8)   | 9 (4.1)     | 0           | 67 (30.5)   |
| Thrombocytopenia                                       | 14 (6.4)              | 16 (7.3)    | 21 (9.5)    | 0           | 51 (23.2)   |
| Vomiting                                               | 41 (18.6)             | 6 (2.7)     | 0           | 0           | 47 (21.4)   |
| Fatigue                                                | 28 (12.7)             | 5 (2.3)     | 0           | 0           | 33 (15.0)   |
| Abdominal pain                                         | 24 (10.5)             | 6 (2.7)     | 0           | 0           | 30 (13.6)   |
| Peripheral edema                                       | 24 (10.9)             | 1 (0.5)     | 0           | 0           | 25 (11.4)   |
| Pneumonia                                              | 8 (3.6)               | 12 (5.5)    | 2 (0.9)     | 3 (1.4)     | 25 (11.4)   |
| Pyrexia                                                | 14 (6.4)              | 5 (2.3)     | 0           | 0           | 19 (8.6)    |
| Hypertension                                           | 5 (2.3)               | 6 (2.7)     | 0           | 0           | 11 (5.0)    |
| Leukopenia                                             | 2 (0.9)               | 5 (2.3)     | 2 (0.9)     | 0           | 9 (4.1)     |
| Cardiac failure                                        | 3 (1.4)               | 6 (2.7)     | 0           | 0           | 9 (4.1)     |
| Febrile neutropenia                                    | 0                     | 5 (2.3)     | 0           | 0           | 5 (2.3)     |
| <b>Hematologic Toxicity Worst</b>                      | <b>Baseline grade</b> |             |             |             |             |
| <b>Grade, n (%)*</b>                                   | <b>0</b>              | <b>1</b>    | <b>2</b>    | <b>3</b>    | <b>4</b>    |
| <b>Hemoglobin</b>                                      | <b>n=62</b>           | <b>n=74</b> | <b>n=71</b> | <b>n=13</b> | <b>n=0</b>  |
| Grade 0                                                | 33 (53.2)             | 1 (1.4)     | 0           | 0           | 0           |
| Grade 1                                                | 21 (33.9)             | 22 (29.7)   | 3 (4.2)     | 0           | 0           |
| Grade 2                                                | 8 (12.9)              | 36 (48.6)   | 26 (36.6)   | 1 (7.7)     | 0           |
| Grade 3                                                | 0                     | 15 (20.3)   | 40 (56.3)   | 12 (92.3)   | 0           |
| Grade 4                                                | 0                     | 0           | 0           | 0           | 0           |
| Grade 5                                                | 0                     | 0           | 0           | 0           | 0           |
| <b>Platelet count</b>                                  | <b>n=119</b>          | <b>n=39</b> | <b>n=16</b> | <b>n=21</b> | <b>n=13</b> |
| Grade 0                                                | 69 (58.0)             | 4 (10.3)    | 0           | 0           | 0           |
| Grade 1                                                | 34 (28.6)             | 10 (25.6)   | 0           | 0           | 0           |
| Grade 2                                                | 9 (7.6)               | 14 (35.9)   | 6 (37.5)    | 1 (4.8)     | 0           |
| Grade 3                                                | 3 (2.5)               | 10 (25.6)   | 7 (43.8)    | 8 (38.1)    | 0           |
| Grade 4                                                | 2 (1.7)               | 1 (2.6)     | 3 (18.8)    | 12 (57.1)   | 12 (92.3)   |
| Grade 5                                                | 0                     | 0           | 0           | 0           | 0           |

\*Green indicates ≥1 grade improvement from baseline; red indicates a ≥1 grade worsening from baseline.

AE, adverse event; BAT, best available therapy.

Additional grade 4 or 5 adverse events with pacritinib: neutropenia (6 gr 4), bone marrow failure (1 gr 4), thrombocytosis (1 gr 4), cardiac failure congestive (1 gr 4, 1 gr 5), pericardial effusion (1 gr 4), gastric varices hemorrhage (1 gr 4), gastrointestinal hemorrhage (1 gr 4), esophageal hemorrhage (1 gr 4), disease progression (2 gr 4, 5 gr 5), portal hypertension (1 gr 4), anaphylactoid reaction (1 gr 4), lobar pneumonia (1 gr 4), sepsis (2 gr 4, 1 gr 5), septic shock (1 gr 4), delayed hemolytic transfusion reaction (1 gr 4), subdural hematoma (1 gr 4), platelet count decreased (4 gr 4), neutrophil count decreased (1 gr 4), blood glucose decreased (1 gr 4), hyperuricemia (3 gr 4), hypercalcemia (1 gr 4), hyperkalemia (1 gr 4), hypomagnesemia (1 gr 4), syncope (1 gr 4), cerebral hemorrhage (1 gr 4), coma (1 gr 4), diabetic neuropathy (1 gr 4), renal failure acute (1 gr 4, 1 gr 5), acute respiratory distress syndrome (1 gr 4), pharyngeal hemorrhage (1 gr 4), hypertensive crisis (2 gr 4), shock hemorrhagic (1 gr 4).

**Supplementary Table 15. Most Common Serious Adverse Events, Through Week 24 or Initial Treatment Discontinuation**

| <b>Serious adverse events in &gt;1 patient in either arm, n (%)</b> | <b>Pacritinib (n=220)</b> | <b>BAT (n=106)</b> |
|---------------------------------------------------------------------|---------------------------|--------------------|
| Anemia                                                              | 10 (4.5)                  | 5 (4.7)            |
| Cardiac failure                                                     | 5 (2.3)                   | 1 (0.9)            |
| Pyrexia                                                             | 4 (1.8)                   | 1 (0.9)            |
| Pneumonia                                                           | 4 (1.8)                   | 1 (0.5)            |
| Atrial fibrillation                                                 | 3 (1.4)                   | 0                  |
| Cardiac failure congestive                                          | 3 (1.4)                   | 0                  |
| Diarrhea                                                            | 3 (1.4)                   | 0                  |
| Lobar pneumonia                                                     | 2 (0.9)                   | 0                  |
| Basal cell carcinoma                                                | 2 (0.9)                   | 0                  |
| Squamous cell carcinoma of skin                                     | 2 (0.9)                   | 0                  |
| Renal failure acute                                                 | 2 (0.9)                   | 0                  |
| Pleural effusion                                                    | 2 (0.9)                   | 1 (0.9)            |
| Epistaxis                                                           | 2 (0.9)                   | 0                  |
| Sepsis                                                              | 1 (0.5)                   | 2 (1.9)            |
| Dyspnea                                                             | 1 (0.5)                   | 2 (1.9)            |

BAT, best available therapy.

**Supplementary Table 16. Incidence of Diarrhea Over Time (All Grades)**

| <b>Time Interval</b> | <b>Pacritinib (n=220), n/n at risk (%)</b> | <b>BAT Initial Treatment (n=106), n/n at risk (%)</b> | <b>BAT Crossover (n=90), n/n at risk (%)<sup>a</sup></b> |
|----------------------|--------------------------------------------|-------------------------------------------------------|----------------------------------------------------------|
| Week 1 – Week 8      | 113/220 (51.4)                             | 6/106 (5.7)                                           | 42/90 (46.7)                                             |
| Week 8 – Week 16     | 26/210 (12.4)                              | 4/103 (3.9)                                           | 13/83 (15.7)                                             |
| Week 16 – Week 24    | 17/195 (8.7)                               | 5/100 (5.0)                                           | 7/75 (9.3)                                               |
| Week 24 – Week 32    | 11/177 (6.2)                               | 1/89 (1.1)                                            | 1/72 (1.4)                                               |
| Week 32 – Week 40    | 12/157 (7.6)                               | 1/33 (3.0)                                            | 3/65 (4.6)                                               |
| Week 40 – Week 48    | 4/140 (2.9)                                | 1/13 (7.7)                                            | 2/61 (3.3)                                               |
| Week 48 – Week 56    | 5/131 (3.8)                                | 1/7 (14.3)                                            | 1/55 (1.8)                                               |
| Week 56 – Week 64    | 4/121 (3.3)                                | 1/6 (16.7)                                            | 3/48 (6.3)                                               |
| Week 64 – Week 72    | 8/114 (7.0)                                | 1/6 (16.7)                                            | 0/38                                                     |
| Week 72 – Week 80    | 7/109 (6.4)                                | 0/5                                                   | 1/32 (3.1)                                               |
| Week 80 – Week 88    | 4/103 (3.9)                                | 0/5                                                   | 0/19                                                     |
| Week 88 – Week 96    | 2/93 (2.2)                                 | 0/5                                                   | 0/13                                                     |
| Week 96 – Week 104   | 3/73 (4.1)                                 | 1/4 (25.0)                                            | 0/7                                                      |
| Week 104 – Week 112  | 1/60 (1.7)                                 | 0/3                                                   | 1/5 (20.0)                                               |
| Week 112 – Week 120  | 1/49 (2.0)                                 | 1/3 (33.3)                                            | 0/2                                                      |
| Week 120 – Week 128  | 1/41 (2.4)                                 | 0/3                                                   | 0/1                                                      |
| Week 128 – Week 136  | 1/24 (4.2)                                 | 0/1                                                   | 0                                                        |
| Week 136 – Week 144  | 0/13                                       | 0/1                                                   | 0                                                        |
| Week 144 – Week 152  | 0/6                                        | 0                                                     | 0                                                        |
| Week 152 – Week 160  | 0/1                                        | 0                                                     | 0                                                        |
| Week 160 – Week 168  | 0                                          | 0                                                     | 0                                                        |

<sup>a</sup>From the time of crossover.  
BAT, best available therapy.

**Supplementary Table 17. Adverse Events Through Week 24 or Initial Treatment Discontinuation in Patients With Baseline Platelet Count <50,000/ $\mu$ L vs Overall**

| Pacritinib-treated patients, n (%) | <50,000/ $\mu$ L (n=35) | Overall (n=220) |
|------------------------------------|-------------------------|-----------------|
| All grade AEs                      | 33 (94.3)               | 192 (87.3)      |
| Grade 3/4 AEs                      | 24 (68.6)               | 107 (48.6)      |
| Serious AEs                        | 14 (40.0)               | 65 (29.5)       |
| AEs leading to drug interruption   | 13 (37.1)               | 48 (21.8)       |
| AEs leading to dose reduction      | 4 (11.4)                | 22 (10.0)       |
| AEs leading to discontinuation     | 5 (14.3)                | 22 (10.0)       |
| AEs leading to death               | 3 (8.6)                 | 8 (3.6)         |
| BAT-treated patients, n (%)        | <50,000/ $\mu$ L (n=15) | Overall (n=106) |
| All grade AEs                      | 11 (73.3)               | 79 (74.5)       |
| Grade 3/4 AEs                      | 6 (40.0)                | 42 (39.6)       |
| Serious AEs                        | 3 (20.0)                | 23 (21.7)       |
| AEs leading to drug interruption   | 0                       | 5 (4.7)         |
| AEs leading to dose reduction      | 0                       | 9 (8.5)         |
| AEs leading to discontinuation     | 0                       | 3 (2.8)         |
| AEs leading to death               | 1 (6.7)                 | 3 (2.8)         |

Note: additional data for additional platelet subgroups (as shown below in Supplementary Table 18) are not available here as week 24 was not the primary analysis point for safety. AE, adverse event.

**Supplementary Table 18. Adverse Events at Any Time on Study in Pacritinib-Treated Patients by Baseline Platelet Count Subgroups and Overall**

| Pacritinib-treated patients, n (%) | Platelets <50,000/ $\mu$ L (n=35) | Platelets <100,000/ $\mu$ L (n=72) | Platelets $\geq$ 100,000/ $\mu$ L (n=148) | Overall (n=220) |
|------------------------------------|-----------------------------------|------------------------------------|-------------------------------------------|-----------------|
| All grade AEs                      | 34 (97.1)                         | 69 (95.8)                          | 138 (93.8)                                | 207 (94.1)      |
| Grade 3/4 AEs                      | 29 (82.9)                         | 61 (84.7)                          | 96 (64.9)                                 | 157 (71.4)      |
| Serious AEs                        | 20 (57.1)                         | 43 (59.7)                          | 77 (52.0)                                 | 120 (54.5)      |
| AEs leading to drug interruption   | 17 (48.6)                         | 31 (43.1)                          | 47 (31.8)                                 | 78 (35.5)       |
| AEs leading to dose reduction      | 6 (17.1)                          | 12 (16.7)                          | 21 (14.2)                                 | 33 (15.0)       |
| AEs leading to discontinuation     | 14 (40.0)                         | 25 (34.7)                          | 25 (16.9)                                 | 50 (22.7)       |
| AEs leading to death               | 9 (25.7)                          | 14 (19.4)                          | 13 (8.8)                                  | 27 (12.3)       |

AE, adverse events.

**Supplementary Table 19. Bleeding Events By SMQ Through Week 24**

| Bleeding events, n (%)                   | Pacritinib (n=220) |           | BAT (n=106) |           |
|------------------------------------------|--------------------|-----------|-------------|-----------|
|                                          | All Grade          | Grade 3/4 | All Grade   | Grade 3/4 |
| Epistaxis                                | 10 (4.5)           | 2 (0.9)   | 9 (8.5)     | 1 (0.9)   |
| Contusion                                | 7 (3.2)            | 0         | 5 (4.7)     | 0         |
| Hematoma                                 | 7 (3.2)            | 1 (0.5)   | 4 (3.8)     | 0         |
| Hematuria                                | 3 (1.4)            | 1 (0.5)   | 0           | 0         |
| Purpura                                  | 3 (1.4)            | 0         | 0           | 0         |
| Gingival bleeding                        | 3 (1.4)            | 0         | 2 (1.9)     | 0         |
| Conjunctival hemorrhage                  | 2 (0.9)            | 0         | 0           | 0         |
| Post procedural hemorrhage               | 2 (0.9)            | 1 (0.5)   | 0           | 0         |
| Spontaneous hematoma                     | 1 (0.5)            | 1 (0.5)   | 0           | 0         |
| Hemoglobin decreased                     | 1 (0.5)            | 1 (0.5)   | 0           | 0         |
| Cerebral hemorrhage                      | 1 (0.5)            | 1 (0.5)   | 0           | 0         |
| Vitreous hemorrhage                      | 1 (0.5)            | 0         | 1 (0.9)     | 0         |
| Eye hemorrhage                           | 1 (0.5)            | 0         | 1 (0.9)     | 0         |
| Hemorrhoidal hemorrhage                  | 1 (0.5)            | 0         | 0           | 0         |
| Vessel puncture site bruise              | 1 (0.5)            | 0         | 0           | 0         |
| Ear hemorrhage                           | 1 (0.5)            | 0         | 0           | 0         |
| Traumatic hematoma                       | 1 (0.5)            | 0         | 1 (0.9)     | 0         |
| Subdural hematoma                        | 1 (0.5)            | 0         | 0           | 0         |
| Traumatic intracranial hemorrhage        | 1 (0.5)            | 0         | 0           | 0         |
| International normalized ratio increased | 1 (0.5)            | 0         | 0           | 0         |
| Petechia                                 | 1 (0.5)            | 0         | 1 (0.9)     | 0         |
| Skin hemorrhage                          | 1 (0.5)            | 0         | 0           | 0         |
| Bleeding varicose vein                   | 1 (0.5)            | 0         | 0           | 0         |
| Melena                                   | 0                  | 0         | 1 (0.9)     | 0         |
| Rectal hemorrhage                        | 0                  | 0         | 1 (0.9)     | 0         |
| Anal hemorrhage                          | 0                  | 0         | 1 (0.9)     | 1 (0.9)   |
| Periorbital hematoma                     | 0                  | 0         | 1 (0.9)     | 0         |
| Subarachnoid hemorrhage                  | 0                  | 0         | 1 (0.9)     | 0         |
| Hemarthrosis                             | 0                  | 0         | 1 (0.9)     | 0         |
| Hemothorax                               | 0                  | 0         | 1 (0.9)     | 1 (0.9)   |
| Hemorrhage subcutaneous                  | 0                  | 0         | 1 (0.9)     | 0         |

BAT, best available therapy.

**Supplementary Table 20. Incidence of Bleeding Events By SMQ Over Time (Grade 3/4)**

| Time Interval       | Pacritinib (n=220),<br>n/n at risk (%) | BAT Initial Treatment<br>(n=106), n/n at risk (%) | BAT Crossover (n=90),<br>n/n at risk (%) <sup>a</sup> |
|---------------------|----------------------------------------|---------------------------------------------------|-------------------------------------------------------|
| Week 1 – Week 8     | 2/220 (0.9)                            | 1/106 (0.9)                                       | 3/90 (3.3)                                            |
| Week 8 – Week 16    | 3/210 (1.4)                            | 1/103 (1.0)                                       | 2/83 (2.4)                                            |
| Week 16 – Week 24   | 3/195 (1.5)                            | 0/100                                             | 0/75                                                  |
| Week 24 – Week 32   | 2/177 (1.1)                            | 0/89                                              | 0/72                                                  |
| Week 32 – Week 40   | 2/157 (1.3)                            | 1/33 (3.0)                                        | 2/65 (3.1)                                            |
| Week 40 – Week 48   | 1/140 (0.7)                            | 0/13                                              | 1/61 (1.6)                                            |
| Week 48 – Week 56   | 2/131 (1.5)                            | 0/7                                               | 0/55                                                  |
| Week 56 – Week 64   | 0/121                                  | 0/6                                               | 0/48                                                  |
| Week 64 – Week 72   | 1/114 (0.9)                            | 0/6                                               | 0/38                                                  |
| Week 72 – Week 80   | 1/109 (0.9)                            | 0/5                                               | 1/32 (3.1)                                            |
| Week 80 – Week 88   | 0/103                                  | 0/5                                               | 0/19                                                  |
| Week 88 – Week 96   | 1/93 (1.1)                             | 0/5                                               | 0/13                                                  |
| Week 96 – Week 104  | 0/73                                   | 0/4                                               | 0/7                                                   |
| Week 104 – Week 112 | 0/60                                   | 0/3                                               | 0/5                                                   |
| Week 112 – Week 120 | 0/49                                   | 0/3                                               | 0/2                                                   |
| Week 120 – Week 128 | 0/41                                   | 0/3                                               | 0/1                                                   |
| Week 128 – Week 136 | 0/24                                   | 0/1                                               | 0                                                     |
| Week 136 – Week 144 | 0/13                                   | 0/1                                               | 0                                                     |
| Week 144 – Week 152 | 0/6                                    | 0                                                 | 0                                                     |
| Week 152 – Week 160 | 0/1                                    | 0                                                 | 0                                                     |
| Week 160 – Week 168 | 0                                      | 0                                                 | 0                                                     |

<sup>a</sup>From the time of crossover.  
BAT, best available therapy.

**Supplementary Table 21. Bleeding Events By SMQ With Pacritinib at Any Time on Study**

| Bleeding events, n (%)                   | Pacritinib (n=220) |           |
|------------------------------------------|--------------------|-----------|
|                                          | All Grade          | Grade 3/4 |
| Epistaxis                                | 19 (8.6)           | 4 (1.8)   |
| Contusion                                | 11 (5.0)           | 0         |
| Hematoma                                 | 9 (4.1)            | 2 (0.9)   |
| Hematuria                                | 6 (2.7)            | 1 (0.5)   |
| Gingival bleeding                        | 5 (2.3)            | 0         |
| Post procedural hemorrhage               | 4 (1.8)            | 2 (0.9)   |
| Petechia                                 | 3 (1.4)            | 0         |
| Purpura                                  | 3 (1.4)            | 0         |
| Gastrointestinal hemorrhage              | 2 (0.9)            | 1 (0.5)   |
| Subdural hematoma                        | 2 (0.9)            | 1 (0.5)   |
| Hemarthrosis                             | 2 (0.5)            | 1 (0.5)   |
| Hemoglobin decreased                     | 2 (0.9)            | 1 (0.5)   |
| Conjunctival hemorrhage                  | 2 (0.9)            | 0         |
| International normalized ratio increased | 2 (0.9)            | 0         |
| Spontaneous hematoma                     | 1 (0.5)            | 1 (0.5)   |
| Melena                                   | 1 (0.5)            | 1 (0.5)   |
| Abdominal wall hematoma                  | 1 (0.5)            | 1 (0.5)   |
| Esophageal hemorrhage                    | 1 (0.5)            | 1 (0.5)   |
| Cerebral hemorrhage                      | 1 (0.5)            | 1 (0.5)   |
| Pharyngeal hemorrhage                    | 1 (0.5)            | 1 (0.5)   |
| Shock hemorrhagic                        | 1 (0.5)            | 1 (0.5)   |
| Ear hemorrhage                           | 1 (0.5)            | 0         |
| Vitreous hemorrhage                      | 1 (0.5)            | 0         |
| Eye hemorrhage                           | 1 (0.5)            | 0         |
| Eyelid bleeding                          | 1 (0.5)            | 0         |
| Gastric varices hemorrhage               | 1 (0.5)            | 0         |
| Hemorrhoidal hemorrhage                  | 1 (0.5)            | 0         |
| Mouth hemorrhage                         | 1 (0.5)            | 0         |
| Vessel puncture site bruise              | 1 (0.5)            | 0         |
| Traumatic hematoma                       | 1 (0.5)            | 0         |
| Pulmonary contusion                      | 1 (0.5)            | 0         |
| Traumatic intracranial hemorrhage        | 1 (0.5)            | 0         |
| Hemorrhage intracranial                  | 1 (0.5)            | 0         |
| Hemoptysis                               | 1 (0.5)            | 0         |
| Ecchymosis                               | 1 (0.5)            | 0         |
| Nail bed bleeding                        | 1 (0.5)            | 0         |
| Skin hemorrhage                          | 1 (0.5)            | 0         |
| Bleeding varicose vein                   | 1 (0.5)            | 0         |
| Hemorrhage                               | 1 (0.5)            | 0         |

**Supplementary Table 22. Cardiac Events By SMQ Through Week 24**

| Cardiac events, n (%)          | Pacritinib (n=220) |           | BAT (n=106) |           |
|--------------------------------|--------------------|-----------|-------------|-----------|
|                                | All Grade          | Grade 3/4 | All Grade   | Grade 3/4 |
| Edema peripheral               | 18 (8.2)           | 1 (0.5)   | 13 (12.3)   | 1 (0.9)   |
| Electrocardiogram QT prolonged | 12 (5.5)           | 3 (1.4)   | 1 (0.9)     | 0         |
| Cardiac failure                | 6 (2.7)            | 5 (2.3)   | 2 (1.9)     | 2 (1.9)   |
| Atrial fibrillation            | 4 (1.8)            | 3 (1.4)   | 1 (0.9)     | 0         |
| Cardiac failure congestive     | 3 (1.4)            | 3 (1.4)   | 0           | 0         |
| Pulmonary edema                | 2 (0.9)            | 1 (0.9)   | 0           | 0         |
| Syncope                        | 1 (0.5)            | 1 (0.5)   | 2 (1.9)     | 2 (1.9)   |
| Angina pectoris                | 1 (0.5)            | 1 (0.5)   | 1 (0.9)     | 0         |
| Cardiac fibrillation           | 1 (0.5)            | 1 (0.5)   | 0           | 0         |
| Sinus tachycardia              | 1 (0.5)            | 1 (0.5)   | 0           | 0         |
| Portal vein thrombosis         | 1 (0.5)            | 1 (0.5)   | 0           | 0         |
| Cerebrovascular accident       | 1 (0.5)            | 1 (0.5)   | 0           | 0         |
| Arrhythmia                     | 1 (0.5)            | 0         | 0           | 0         |
| Atrial flutter                 | 1 (0.5)            | 0         | 0           | 0         |
| Cardio-respiratory arrest      | 1 (0.5)            | 0         | 0           | 0         |
| Left ventricular dysfunction   | 1 (0.5)            | 0         | 0           | 0         |
| Palpitations                   | 1 (0.5)            | 0         | 0           | 0         |
| Heart rate increased           | 1 (0.5)            | 0         | 0           | 0         |
| Coronary artery disease        | 0                  | 0         | 1 (0.9)     | 1 (0.9)   |
| Splenic infarction             | 0                  | 0         | 1 (0.9)     | 1 (0.9)   |
| Angina unstable                | 0                  | 0         | 1 (0.9)     | 1 (0.9)   |
| Pulmonary embolism             | 0                  | 0         | 1 (0.9)     | 1 (0.9)   |
| Sick sinus syndrome            | 0                  | 0         | 1 (0.9)     | 0         |
| Bundle branch block left       | 0                  | 0         | 1 (0.9)     | 0         |
| Tachycardia                    | 0                  | 0         | 1 (0.9)     | 0         |
| Transient ischemic attack      | 0                  | 0         | 1 (0.9)     | 0         |
| Arterial thrombosis            | 0                  | 0         | 1 (0.9)     | 0         |

BAT, best available therapy.

**Supplementary Table 23. Incidence of Cardiac Events By SMQ Over Time (Grade 3/4)**

| Time Interval       | Pacritinib (n=220),<br>n/n at risk (%) | BAT Initial Treatment<br>(n=106), n/n at risk (%) | BAT Crossover (n=90),<br>n/n at risk (%) |
|---------------------|----------------------------------------|---------------------------------------------------|------------------------------------------|
| Week 1 – Week 8     | 8/220 (3.6)                            | 2/106 (1.9)                                       | 1/90 (1.1)                               |
| Week 8 – Week 16    | 7/210 (3.3)                            | 4/103 (3.9)                                       | 0/83                                     |
| Week 16 – Week 24   | 6/195 (3.1)                            | 0/100                                             | 3/75 (4.0)                               |
| Week 24 – Week 32   | 1/177 (0.6)                            | 0/89                                              | 1/72 (1.4)                               |
| Week 32 – Week 40   | 2/157 (1.3)                            | 0/33                                              | 0/65                                     |
| Week 40 – Week 48   | 1/140 (0.7)                            | 0/13                                              | 2/61 (3.3)                               |
| Week 48 – Week 56   | 2/131 (1.5)                            | 0/7                                               | 1/55 (1.8)                               |
| Week 56 – Week 64   | 0/121                                  | 0/6                                               | 0/48                                     |
| Week 64 – Week 72   | 0/114                                  | 0/6                                               | 1/38 (2.6)                               |
| Week 72 – Week 80   | 0/109                                  | 0/5                                               | 0/32                                     |
| Week 80 – Week 88   | 1/103 (1.0)                            | 0/5                                               | 0/19                                     |
| Week 88 – Week 96   | 1/93 (1.1)                             | 0/5                                               | 0/13                                     |
| Week 96 – Week 104  | 1/73 (1.4)                             | 0/4                                               | 0/7                                      |
| Week 104 – Week 112 | 0/60                                   | 0/3                                               | 0/5                                      |
| Week 112 – Week 120 | 0/49                                   | 0/3                                               | 0/2                                      |
| Week 120 – Week 128 | 1/41 (2.4)                             | 0/3                                               | 0/1                                      |
| Week 128 – Week 136 | 0/24                                   | 0/1                                               | 0                                        |
| Week 136 – Week 144 | 0/13                                   | 0/1                                               | 0                                        |
| Week 144 – Week 152 | 0/6                                    | 0                                                 | 0                                        |
| Week 152 – Week 160 | 0/1                                    | 0                                                 | 0                                        |
| Week 160 – Week 168 | 0                                      | 0                                                 | 0                                        |

<sup>a</sup>From the time of crossover; BAT, best available therapy.

**Supplementary Table 24. Cardiac Events By SMQ With Pacritinib at Any Time on Study**

| Cardiac events, n (%)          | Pacritinib (n=220) |           |
|--------------------------------|--------------------|-----------|
|                                | All Grade          | Grade 3/4 |
| Edema peripheral               | 25 (11.4)          | 1 (0.5)   |
| Electrocardiogram QT prolonged | 12 (5.5)           | 3 (1.4)   |
| Cardiac failure                | 9 (4.1)            | 6 (2.7)   |
| Atrial fibrillation            | 8 (3.6)            | 4 (1.8)   |
| Cardiac failure congestive     | 4 (1.8)            | 4 (1.8)   |
| Pulmonary edema                | 3 (1.4)            | 2 (0.9)   |
| Syncope                        | 2 (0.9)            | 2 (0.9)   |
| Cardiac failure acute          | 2 (0.9)            | 0         |
| Angina pectoris                | 1 (0.5)            | 1 (0.5)   |
| Acute myocardial infarction    | 1 (0.5)            | 1 (0.5)   |
| Cardiac fibrillation           | 1 (0.5)            | 1 (0.5)   |
| Right ventricular failure      | 1 (0.5)            | 1 (0.5)   |
| Sinus tachycardia              | 1 (0.5)            | 1 (0.5)   |
| Portal vein thrombosis         | 1 (0.5)            | 1 (0.5)   |
| Ejection fraction decreased    | 1 (0.5)            | 1 (0.5)   |
| Cerebrovascular accident       | 1 (0.5)            | 1 (0.5)   |
| Deep vein thrombosis           | 1 (0.5)            | 1 (0.5)   |
| Supraventricular tachycardia   | 1 (0.5)            | 0         |
| Tachycardia                    | 1 (0.5)            | 0         |
| Arrhythmia                     | 1 (0.5)            | 0         |
| Atrial flutter                 | 1 (0.5)            | 0         |
| Cardiac arrest                 | 1 (0.5)            | 0         |
| Cardio-respiratory arrest      | 1 (0.5)            | 0         |
| Left ventricular dysfunction   | 1 (0.5)            | 0         |
| Myocardial infarction          | 1 (0.5)            | 0         |
| Myocardial ischemia            | 1 (0.5)            | 0         |
| Palpitations                   | 1 (0.5)            | 0         |
| Sudden death                   | 1 (0.5)            | 0         |
| Heart rate increased           | 1 (0.5)            | 0         |

BAT, best available therapy.

**Supplementary Table 25. Changes in Leukocyte and Neutrophil Counts From Baseline to Week 24.**

| Parameter                                        | Pacritinib (n=220) |                    | BAT (n=106)        |                    |
|--------------------------------------------------|--------------------|--------------------|--------------------|--------------------|
|                                                  | Baseline           | Week 24            | Baseline           | Week 24            |
| Median leukocytes, × 10 <sup>9</sup> /L (range)  | n=220              | n=160              | n=105              | n=64               |
|                                                  | 9.9<br>(1.2-169.6) | 8.1<br>(1.1-249.3) | 11.7<br>(1.9-85.0) | 10.1<br>(2.0-44.4) |
| Median neutrophils, × 10 <sup>9</sup> /L (range) | n=201              | n=129              | n=99               | n=54               |
|                                                  | 7.2<br>(0.2-84.8)  | 5.6<br>(0.2-65.9)  | 8.3<br>(1.3-52.7)  | 6.1<br>(1.2-39.2)  |

BAT, best available therapy.



**Supplementary Table 26. Discontinuations Due to Adverse Events Through Week 24.**

| <b>Adverse Event, n (%)</b>                                     | <b>Pacritinib<br/>(n=220)</b> | <b>BAT<br/>(n=106)</b> |
|-----------------------------------------------------------------|-------------------------------|------------------------|
| Patients with $\geq 1$ AE leading to study drug discontinuation | 22 (10.0)                     | 3 (2.8)                |
| Diarrhea                                                        | 3 (1.4)                       | 0                      |
| Thrombocytopenia                                                | 2 (0.9)                       | 0                      |
| Anemia                                                          | 1 (0.5)                       | 0                      |
| Abdominal pain                                                  | 1 (0.5)                       | 0                      |
| Diverticular perforation                                        | 1 (0.5)                       | 0                      |
| Splenomegaly                                                    | 1 (0.5)                       | 0                      |
| Thrombocytosis                                                  | 1 (0.5)                       | 0                      |
| Platelet count decreased                                        | 1 (0.5)                       | 0                      |
| Cardiac failure                                                 | 1 (0.5)                       | 0                      |
| Cardiac failure, congestive                                     | 1 (0.5)                       | 0                      |
| Portal vein thrombosis                                          | 1 (0.5)                       | 0                      |
| Peritonitis                                                     | 1 (0.5)                       | 0                      |
| Pneumonia                                                       | 1 (0.5)                       | 0                      |
| Traumatic intracranial hemorrhage                               | 1 (0.5)                       | 0                      |
| Hyponatremia                                                    | 1 (0.5)                       | 0                      |
| Bone pain                                                       | 1 (0.5)                       | 0                      |
| Non-small cell lung cancer                                      | 1 (0.5)                       | 0                      |
| Cerebral hemorrhage                                             | 1 (0.5)                       | 0                      |
| Cerebrovascular accident                                        | 1 (0.5)                       | 0                      |
| Coma                                                            | 1 (0.5)                       | 0                      |
| Parkinson's disease                                             | 1 (0.5)                       | 0                      |
| Azotemia                                                        | 1 (0.5)                       | 0                      |
| Hematuria                                                       | 1 (0.5)                       | 0                      |
| Ocular rosacea                                                  | 0                             | 1 (0.9)                |
| Septic shock                                                    | 0                             | 1 (0.9)                |
| Parasthesia                                                     | 0                             | 1 (0.9)                |
| Renal failure                                                   | 0                             | 1 (0.9)                |
| Acute respiratory distress syndrome                             | 0                             | 1 (0.9)                |

AE, adverse event; BAT, best available therapy.

**Supplementary Figure 1. Mean percentage change in spleen volume over time for evaluable patients.**  
 (A) patients with baseline platelet count <50,000/ $\mu$ L, (B) patients with baseline platelet count <100,000/ $\mu$ L

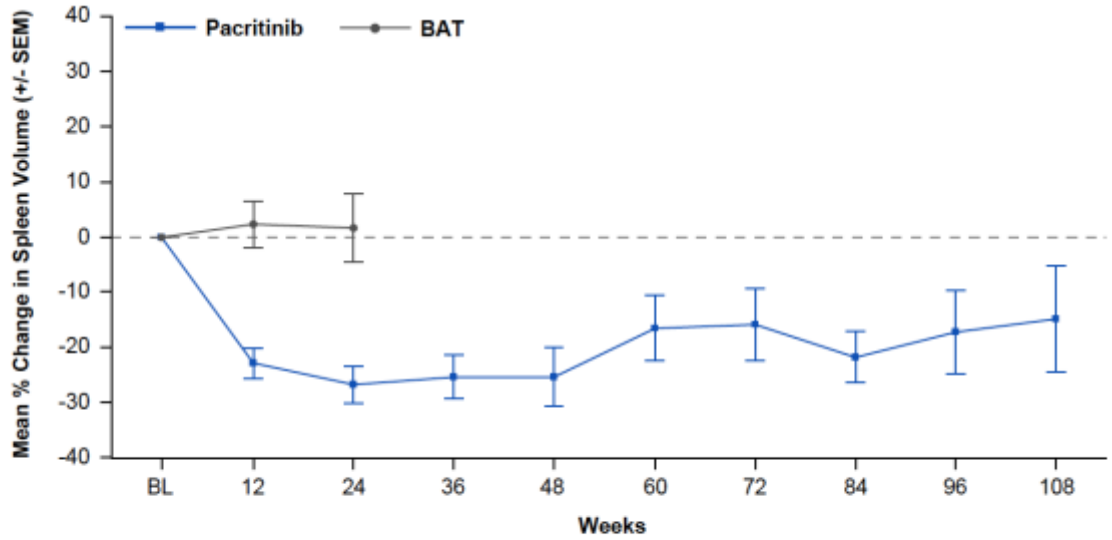

**Number of Patients**

|            |    |    |    |    |    |    |    |    |    |   |
|------------|----|----|----|----|----|----|----|----|----|---|
| Pacritinib | 35 | 29 | 24 | 18 | 13 | 14 | 12 | 12 | 10 | 7 |
| BAT        | 16 | 13 | 11 |    |    |    |    |    |    |   |

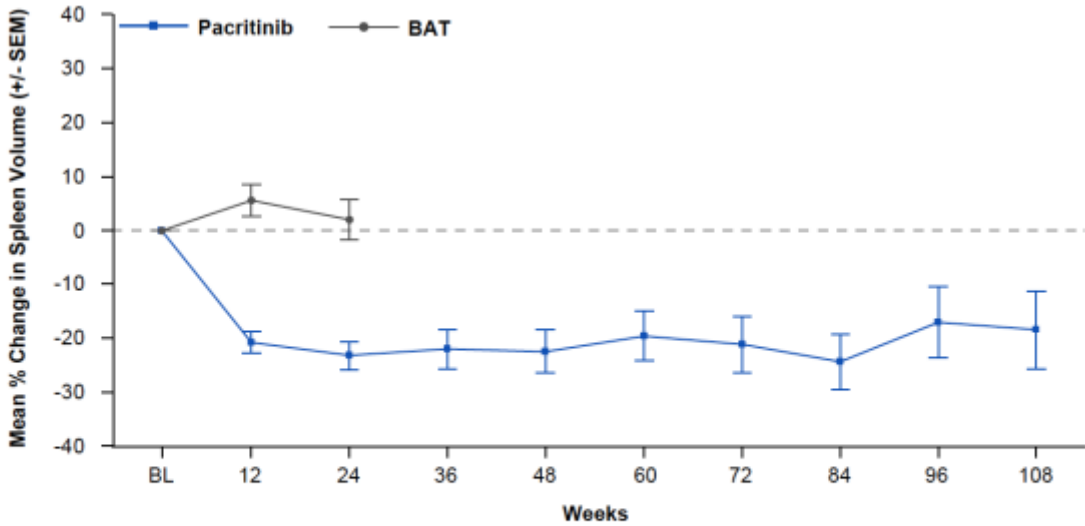

**Number of Patients**

|            |    |    |    |    |    |    |    |    |    |    |
|------------|----|----|----|----|----|----|----|----|----|----|
| Pacritinib | 72 | 63 | 51 | 37 | 32 | 31 | 24 | 21 | 17 | 13 |
| BAT        | 34 | 29 | 24 |    |    |    |    |    |    |    |

**Supplementary Figure 2. Forest Plot of Hazard Ratio for OS Estimates by Subgroup.**

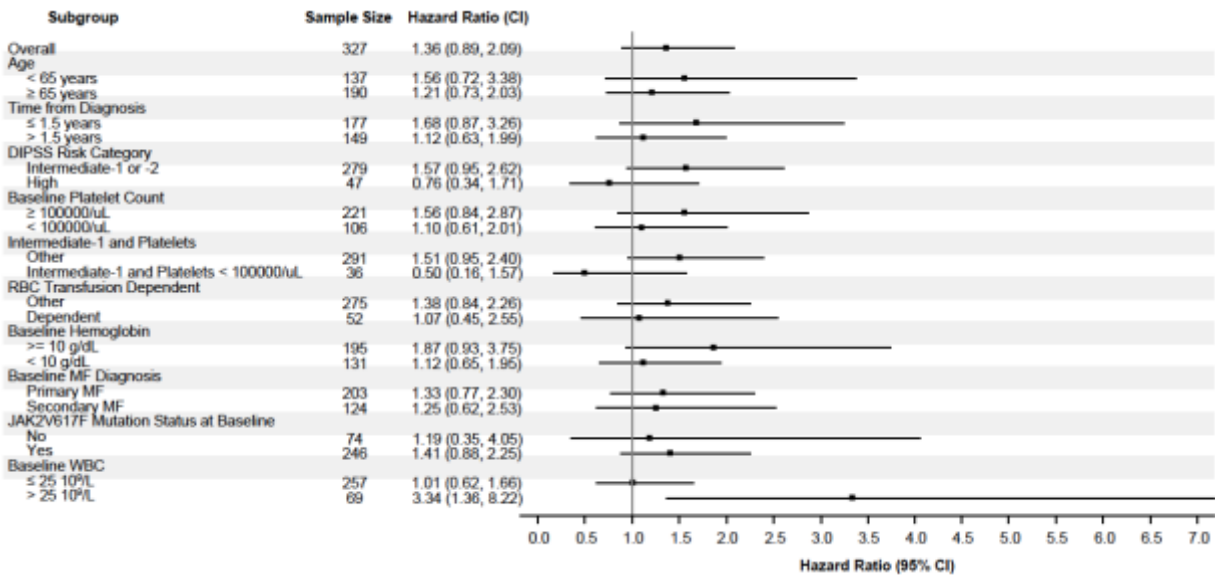

**Supplementary Figure 3. OS by Number of Risk Factors in Patients Randomized to Pacritinib (PAC) or BAT.**

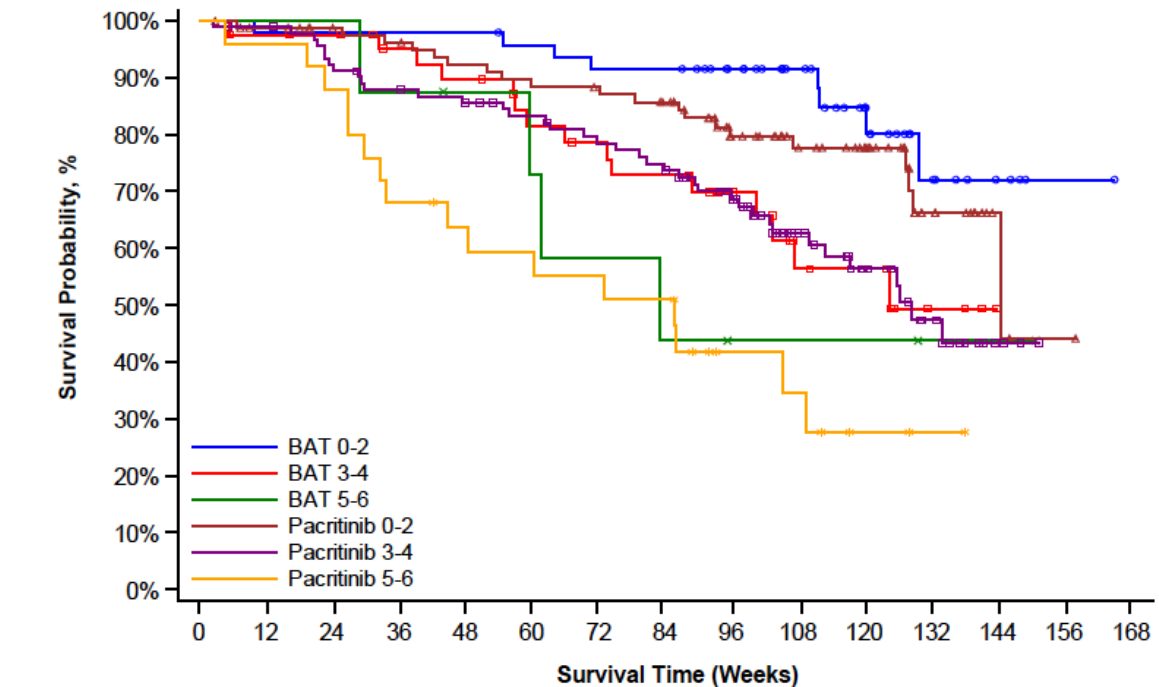

| Patients at Risk |    | 0  | 12 | 24 | 36 | 48 | 60 | 72 | 84 | 96 | 108 | 120 | 132 | 144 | 156 | 168 |
|------------------|----|----|----|----|----|----|----|----|----|----|-----|-----|-----|-----|-----|-----|
| BAT 0-2          | 48 | 47 | 47 | 47 | 47 | 45 | 43 | 43 | 37 | 29 | 19  | 9   | 4   | 1   | 0   | 0   |
| BAT 3-4          | 43 | 41 | 40 | 36 | 34 | 29 | 27 | 25 | 19 | 11 | 9   | 3   | 0   | 0   | 0   | 0   |
| BAT 5-6          | 8  | 8  | 8  | 7  | 6  | 5  | 4  | 3  | 2  | 2  | 2   | 1   | 1   | 0   | 0   | 0   |
| Pacritinib 0-2   | 86 | 82 | 78 | 75 | 71 | 68 | 67 | 63 | 47 | 36 | 30  | 12  | 3   | 1   | 0   | 0   |
| Pacritinib 3-4   | 93 | 91 | 84 | 79 | 75 | 71 | 66 | 62 | 51 | 34 | 22  | 13  | 4   | 0   | 0   | 0   |
| Pacritinib 5-6   | 25 | 24 | 22 | 17 | 15 | 14 | 13 | 12 | 6  | 5  | 2   | 1   | 0   | 0   | 0   | 0   |

**Supplementary Figure 4. Changes in Platelet Counts and Hemoglobin Levels During Treatment.** Mean platelet counts over time ( $\pm$ SEM) from baseline in (A) all patients and (B) patients with baseline platelets  $<50,000/\mu\text{L}$ . (C) Mean percentage change in platelets ( $\pm$ SEM) in patients with baseline platelets  $<50,000/\mu\text{L}$ . (D) Mean hemoglobin levels ( $\pm$ SEM) from baseline in pacritinib- and BAT-treated patients. (E) Mean hemoglobin levels ( $\pm$ SEM) in patients with baseline hemoglobin  $<10$  g/dL, including patients who received red blood cell transfusions.

**A**

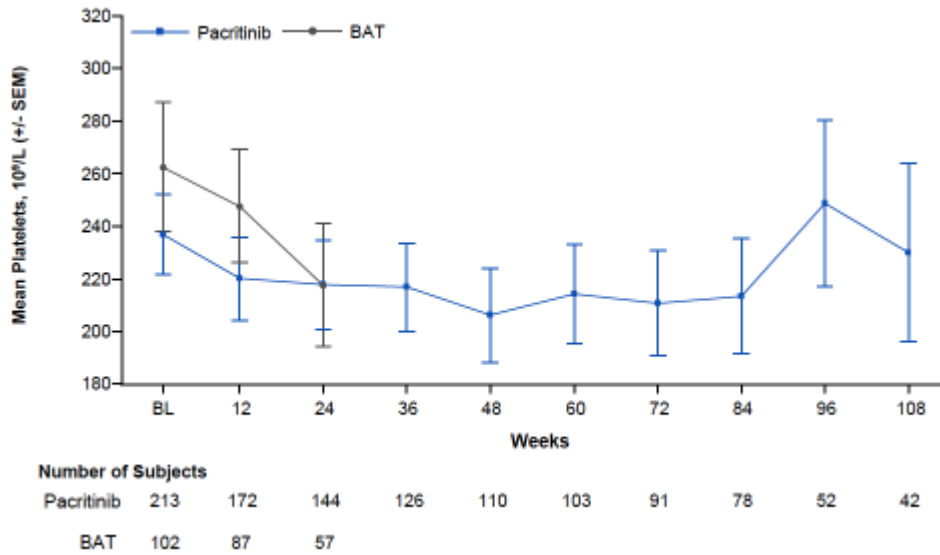

**B**

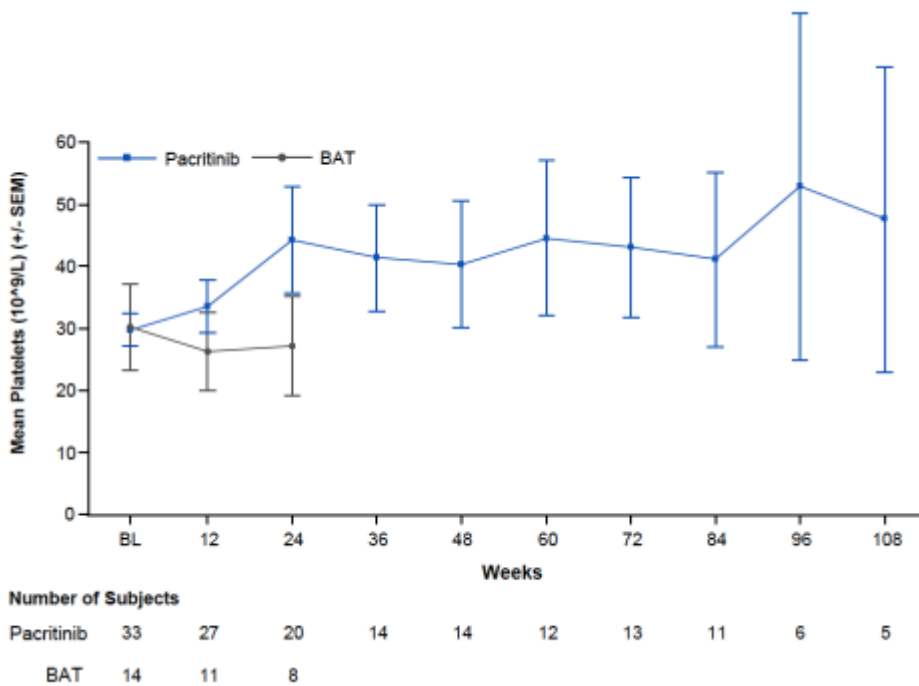

C

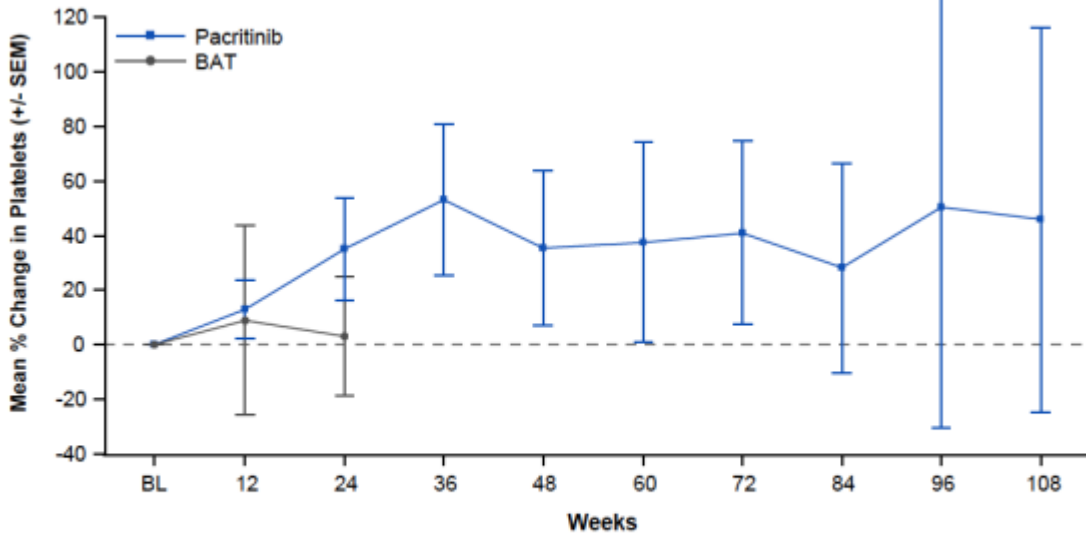

Number of Subjects

|            |    |    |    |    |    |    |    |    |   |   |
|------------|----|----|----|----|----|----|----|----|---|---|
| Pacritinib | 33 | 25 | 19 | 13 | 13 | 10 | 11 | 10 | 5 | 4 |
| BAT        | 14 | 10 | 7  |    |    |    |    |    |   |   |

D

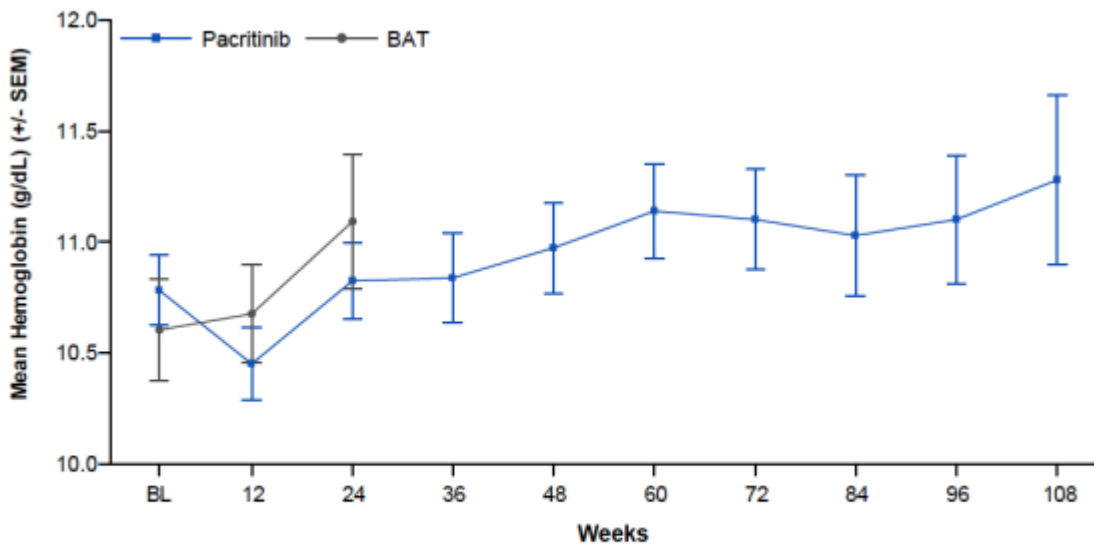

Number of Subjects

|            |     |     |     |     |     |     |     |    |    |    |
|------------|-----|-----|-----|-----|-----|-----|-----|----|----|----|
| Pacritinib | 220 | 188 | 161 | 135 | 123 | 113 | 101 | 86 | 61 | 48 |
| BAT        | 105 | 97  | 64  |     |     |     |     |    |    |    |

**E**

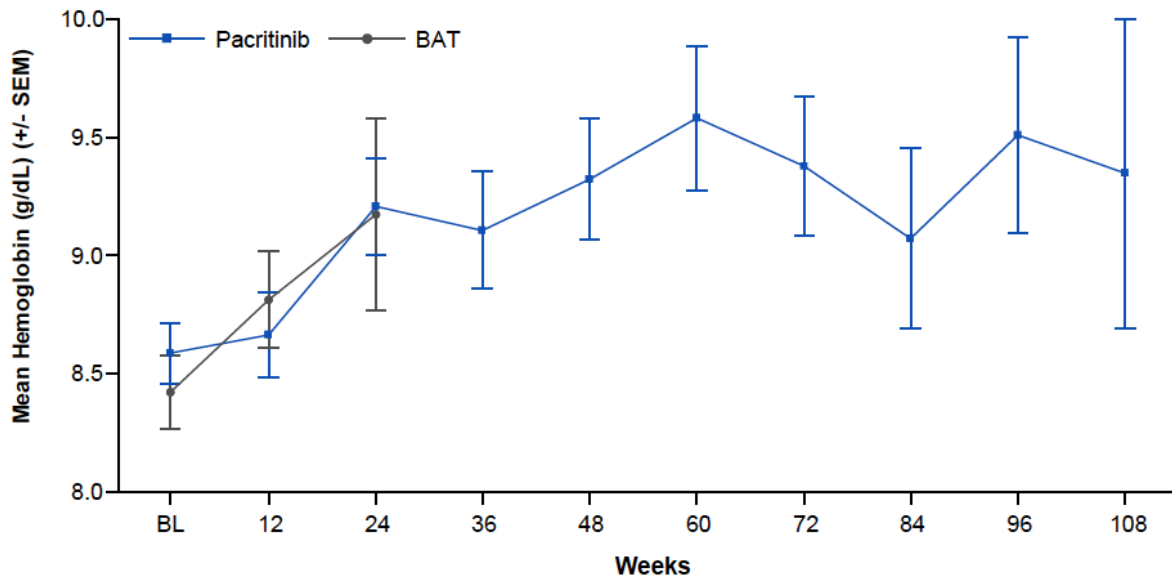

**Number of Subjects**

|            |    |    |    |    |    |    |    |    |    |    |
|------------|----|----|----|----|----|----|----|----|----|----|
| Pacritinib | 84 | 71 | 56 | 44 | 41 | 33 | 28 | 23 | 15 | 13 |
| BAT        | 46 | 40 | 24 |    |    |    |    |    |    |    |
